# Supplementary material for: Evaluating four gap-filling methods for eddy covariance measurements of evapotranspiration over hilly crop fields
Source: Copernicus journal article supplement (doi:10.5194/gi-7-151-2018), 2018-06-07
Supplement: Supplementary file 1 [file gi-7-151-2018-supplement.pdf]

Supplement of Geosci. Instrum. Method. Data Syst., 7, 151–167, 2018  
<https://doi.org/10.5194/gi-7-151-2018-supplement>  
© Author(s) 2018. This work is distributed under  
the Creative Commons Attribution 4.0 License.

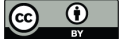

*Supplement of*

## **Evaluating four gap-filling methods for eddy covariance measurements of evapotranspiration over hilly crop fields**

**Nissaf Boudhina et al.**

*Correspondence to:* Rim Zitouna-Chebbi (rimzitouna@gmail.com)

The copyright of individual parts of the supplement might differ from the CC BY 4.0 License.

**1 Supplementary Materials: list of Figures**

2

3 **Field B**

GV

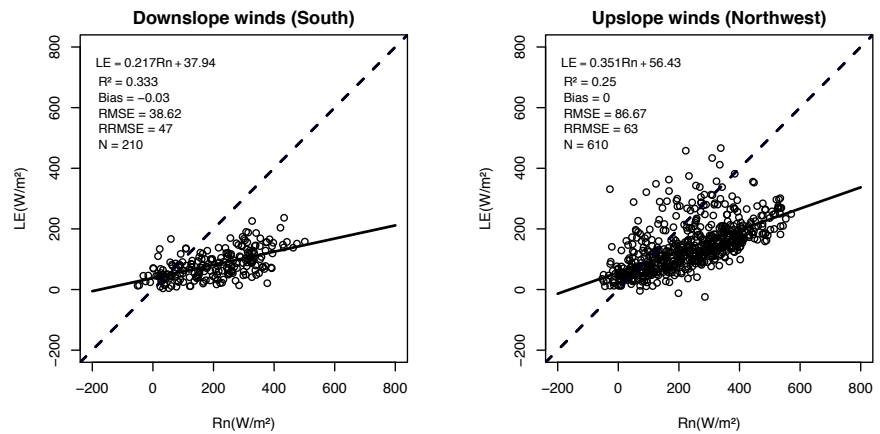

4

5

6

7

8

9

10

11

12

13

14

15

16 Figure S1a. Calibration of the LE - Rn gap-filling method on field B. Columns 1 and 2 correspond to  
17 downslope and upslope winds, respectively. Line 1 corresponds to the period with green vegetation  
18 (GV). The dashed line is the 1:1 line, and the continuous line is the regression line. R<sup>2</sup> is coefficient of  
19 determination. RMSE and RRMSE are absolute and relative root mean square errors, respectively. N  
20 is the number of flux data calculated over 30 min intervals.

21

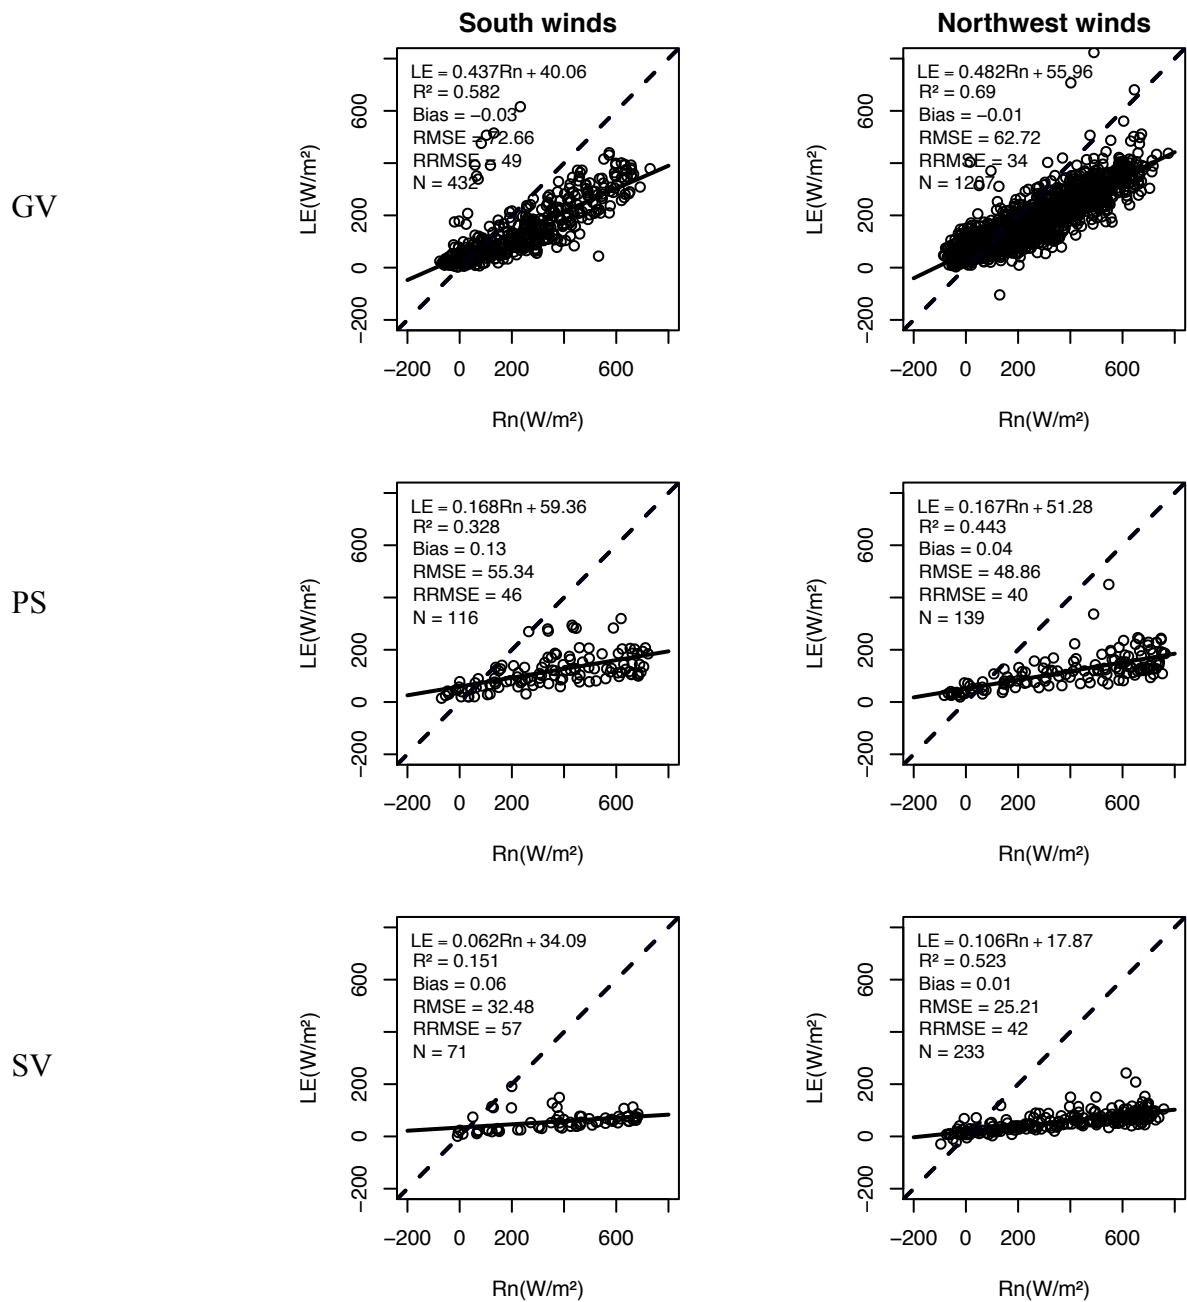

23

24 Figure S1b. Calibration of the LE - Rn gap-filling method on field C. Columns 1 and 2 correspond to  
 25 south and northwest winds, respectively. Lines 1, 2 and 3 correspond to the three periods (GV, PS,  
 26 SV) that differed in vegetation phenology, soil water content and climatic conditions. The dashed line  
 27 is the 1:1 line, and the continuous line is the regression line. R<sup>2</sup> is coefficient of determination. RMSE  
 28 and RRMSE are absolute and relative root mean square errors, respectively. N is the number of flux  
 29 data calculated over 30 min intervals.

30

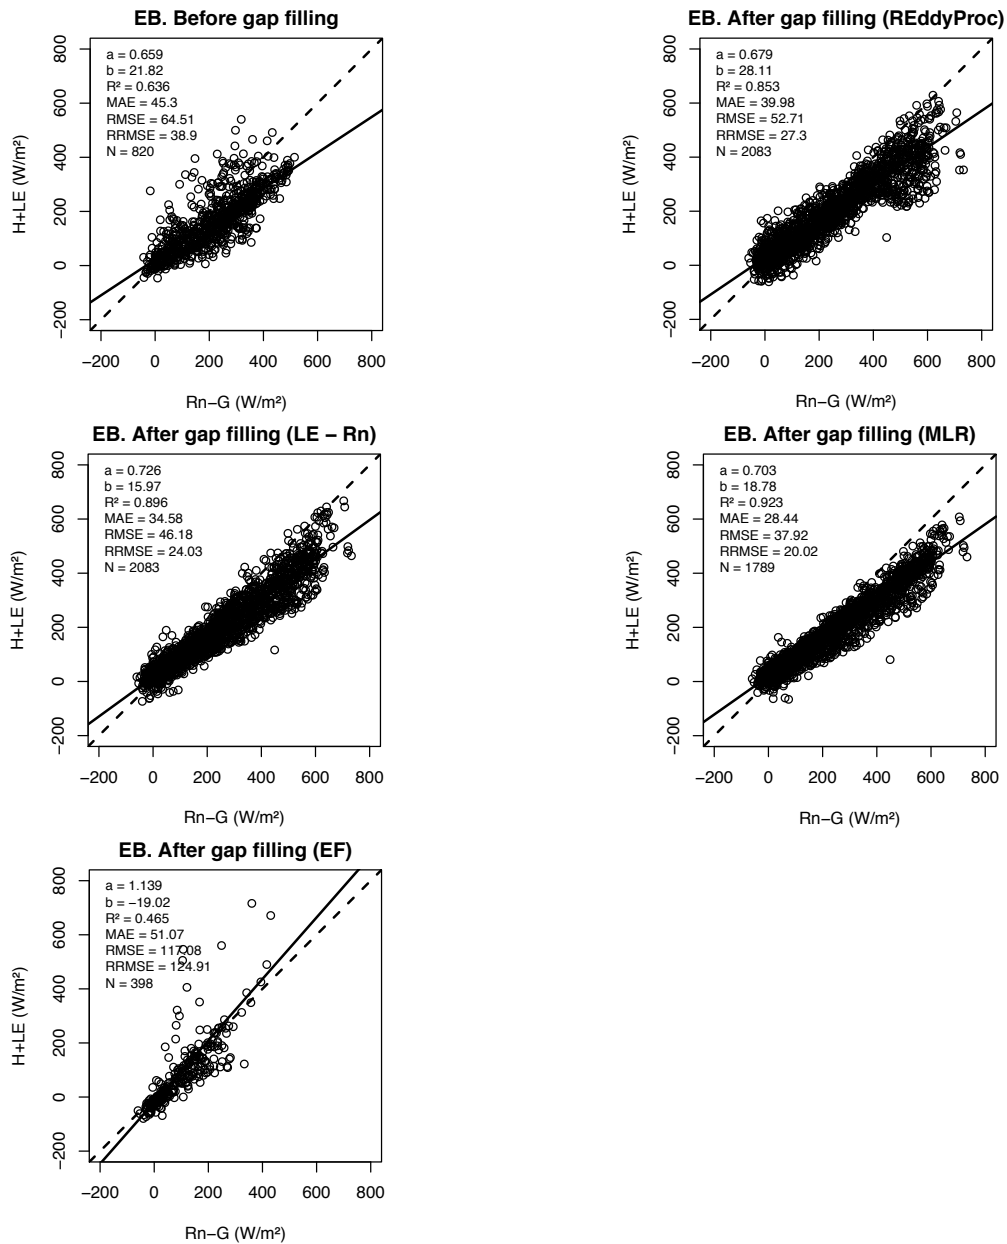

32

33 Figure S2a. Energy balance closure (EB) for field B. Flux data are calculated over 30 minutes  
 34 intervals. Statistical indicators correspond to the comparison of convective energy (H + LE) on y-axis  
 35 against the available energy (Rn - G) on x-axis, before (top left subplot) and after (other subplots)  
 36 reconstruction of LE data by the four gap-filling methods. The dashed line is the 1:1 line, and the  
 37 continuous line is the regression line. Terms a and b are the slope and the intercept of the linear  
 38 regression, respectively.  $R^2$  is coefficient of determination. MAE is the mean absolute error. RMSE  
 39 and RRMSE are absolute and relative root mean square errors, respectively. N is the number of 30 min  
 40 intervals data.

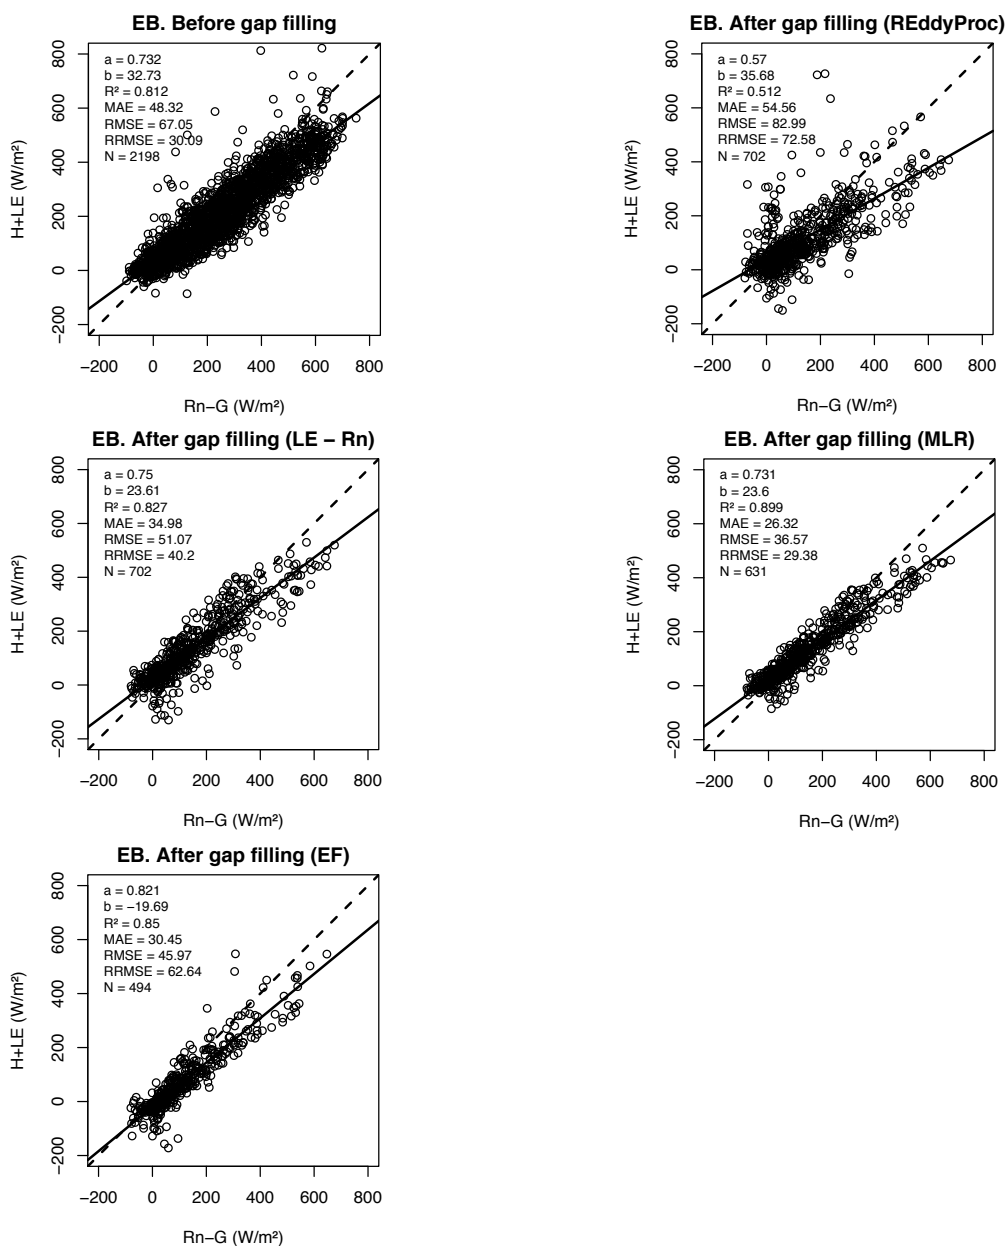

42

43 Figure S2b. Energy balance closure (EB) for field C. Flux data are calculated over 30 minutes  
 44 intervals. Statistical indicators correspond to the comparison of convective energy (H + LE) on y-axis  
 45 against the available energy (Rn - G) on x-axis, before (top left subplot) and after (others subplots)  
 46 reconstruction of LE data by the four gap-filling methods. The dashed line is the 1:1 line, and the  
 47 continuous line is the regression line. Terms a and b are the slope and the intercept of the linear  
 48 regression, respectively. R<sup>2</sup> is coefficient of determination. MAE is the mean absolute error. RMSE  
 49 and RRMSE are absolute and relative root mean square errors, respectively. N is the number of 30 min  
 50 intervals data.

51 **Supplementary Materials: list of tables**

52

53

54 Table S1. Covariance analysis on regression coefficients for the LE - Rn method when  
 55 discriminating between the two main winds directions.

56

| Field | Period | Test of equal slopes | Test of equal intercepts |
|-------|--------|----------------------|--------------------------|
| A     | GV     | **                   | *                        |
|       | PS     |                      | **                       |
|       | SV     |                      |                          |
| B     | GV     | ***                  |                          |
| C     | GV     |                      | **                       |
|       | PS     |                      |                          |
|       | SV     | *                    | *                        |

Signification codes

\*\*\*  $\leq 0.001$

$0.001 < ** \leq 0.01$

$0.01 < * \leq 0.05$

57

58



59 Table S2. Accuracy of LE retrievals for the four gap-filling methods (REddyProc, LE - Rn, MLR, EF). Fluxes were calculated over 30-min  
60 intervals. Retrieval accuracy is given for each field (A, B, C) and each wind direction (NW and S stands for northwest and south winds,  
61 respectively) along with the corresponding airflow inclination when applicable (Up and Down stands for upslope and downslope winds,  
62 respectively). Accuracy is quantified using statistical indicators (absolute and relative RMSE, Bias, coefficient of determination R<sup>2</sup>).

|                             |           | Field A  | Field B  | Field C  | Field A   |              | Field B     |            | Field C |        |
|-----------------------------|-----------|----------|----------|----------|-----------|--------------|-------------|------------|---------|--------|
|                             |           | All data | All data | All data | S<br>(Up) | NW<br>(Down) | S<br>(Down) | NW<br>(Up) | S       | NW     |
| RMSE<br>(W/m <sup>2</sup> ) | REddyProc | 44.8     | 70.5     | 51.9     | 42.3      | 41.4         | 23.3        | 77.2       | 51.1    | 49.1   |
|                             | LE-Rn     | 56.8     | 80.2     | 61.0     | 56.3      | 55.5         | 38.6        | 86.7       | 66.2    | 57.5   |
|                             | MLR       | 58.3     | 61.7     | 59.7     | 55.1      | 55.8         | 37.3        | 61.9       | 61.9    | 57.0   |
|                             | EF        | 57.5     | 87.3     | 62.8     | 48.1      | 56.8         | 42.9        | 98.2       | 63.8    | 57.8   |
| RRMSE<br>(%)                | REddyProc | 36       | 57       | 34       | 37        | 32           | 28          | 56         | 42      | 30     |
|                             | LE-Rn     | 46       | 65       | 40       | 50        | 44           | 47          | 63         | 50      | 35     |
|                             | MLR       | 45       | 48       | 37       | 47        | 41           | 45          | 43         | 45      | 34     |
|                             | EF        | 47       | 70       | 41       | 43        | 44           | 52          | 70         | 48      | 36     |
| Bias<br>(W/m <sup>2</sup> ) | REddyProc | -1.34    | -1.13    | -0.65    | -2.14     | -0.90        | -0.96       | -1.58      | 2.20    | -0.80  |
|                             | LE-Rn     | 0.01     | 0.00     | 0.00     | 0.00      | 0.01         | -0.03       | 0.00       | 0.01    | 0.00   |
|                             | MLR       | 0.04     | -0.02    | 0.01     | -0.09     | 0.08         | -0.15       | 0.00       | 0.00    | 0.03   |
|                             | EF        | -16.15   | -6.48    | -15.79   | -10.54    | -19.04       | -0.93       | -8.43      | -12.84  | -17.73 |
| R <sup>2</sup>              | REddyProc | 0.74     | 0.42     | 0.78     | 0.75      | 0.78         | 0.75        | 0.40       | 0.83    | 0.81   |
|                             | LE-Rn     | 0.58     | 0.25     | 0.69     | 0.56      | 0.61         | 0.32        | 0.25       | 0.59    | 0.73   |
|                             | MLR       | 0.58     | 0.35     | 0.72     | 0.59      | 0.62         | 0.36        | 0.38       | 0.65    | 0.75   |
|                             | EF        | 0.69     | 0.29     | 0.74     | 0.75      | 0.71         | 0.52        | 0.24       | 0.83    | 0.80   |
